# Supplementary material
Source: ML conference proceedings conference paper supplement (https://proceedings.mlr.press/v89/sessa19a.html)
Supplement: Supplementary file [file sessa19a-supp.pdf]

## A Supplementary material for Sections 3-4

### A.1 Proof of Remark 1

Since  $f$  is monotone,  $f(\mathbf{x} + k\mathbf{e}_i) \geq f(\mathbf{x})$  and  $f(k\mathbf{e}_i) \geq f(\mathbf{0})$  for any  $\mathbf{x} \in \mathcal{Z}$ ,  $i \in [n]$ , and  $k \in \mathbb{R}_+$ . Hence,  $\alpha(\mathcal{Z}) \leq 1$ . Moreover,  $\inf_{\mathbf{x} \in \mathcal{Z}} \lim_{k \rightarrow 0^+} \frac{f(\mathbf{x} + k\mathbf{e}_i) - f(\mathbf{x})}{f(k\mathbf{e}_i) - f(\mathbf{0})} \leq 1$ , since the considered ratio equals 1 when  $\mathbf{x} = \mathbf{0}$ . Hence,  $\alpha(\mathcal{Z}) \geq 0$ .  $\square$

### A.2 Proof of Remark 2

The proof is obtained simply noting that the curvature  $\alpha(\mathcal{S})$  of  $\gamma$  is always upper bounded by 1.  $\square$

### A.3 Proof of Proposition 1

We first show that the budget allocation game of Example 1 is a valid utility game with continuous strategies. In fact, for any  $l \in [Nd]$

$$[\nabla\gamma(\mathbf{s})]_l = \sum_{t \in \mathcal{T}: m \in \Gamma(t)} -\ln(1 - p_j(m, t)) \prod_{i=1}^N (1 - P_i(\mathbf{s}_i, t)),$$

where  $j \in [N]$  and  $m \in [d]$  are the indexes of advertiser and channel corresponding to coordinate  $l \in [Nd]$ , respectively. Hence,  $\gamma$  is monotone since  $[\nabla\gamma(\mathbf{s})]_l \geq 0$  for any  $l \in [Nd]$  and  $\mathbf{s} \in \mathbb{R}_+^{Nd}$ . Moreover,  $\gamma$  is DR-submodular since  $\gamma(\mathbf{s}) = \sum_{t \in \mathcal{T}} \gamma_t(\mathbf{s})$  where  $\gamma_t(\mathbf{s}) = 1 - \prod_{i=1}^N (1 - P_i(\mathbf{s}_i, t))$  is such that for any  $j, l \in [N]$ ,  $m, n \in [d]$ ,  $\frac{\partial^2 \gamma_t(\mathbf{s})}{\partial [\mathbf{s}_j]_m \partial [\mathbf{s}_l]_n} = -\ln(1 - p_j(m, t) \ln(1 - p_l(n, t)) \prod_{i=1}^N (1 - P_i(\mathbf{s}_i, t)) \leq 0$  for any  $\mathbf{s} \in \mathbb{R}_+^{Nd}$ . Finally, condition ii) can be verified equivalently as in [23, Proof of Proposition 5] and condition iii) holds with equality.

The set  $\tilde{\mathcal{S}} := \{\mathbf{x} \in \mathbb{R}_+^{Nd} \mid \mathbf{0} \leq \mathbf{x} \leq \mathbf{s}_{max}\}$  with  $\mathbf{s}_{max} = 2(\bar{s}_1, \dots, \bar{s}_N)$  is such that  $\mathbf{s} + \mathbf{s}' \leq \mathbf{s}_{max}$  for any pair  $\mathbf{s}, \mathbf{s}' \in \tilde{\mathcal{S}}$ . Moreover, using the expression of  $\nabla\gamma(\mathbf{s})$ , the curvature of  $\gamma$  with respect to  $\tilde{\mathcal{S}}$  is

$$\begin{aligned} 1 - \alpha(\tilde{\mathcal{S}}) &= \inf_{\substack{\mathbf{s} \in \tilde{\mathcal{S}} \\ l \in [Nd]}} \frac{[\nabla\gamma(\mathbf{s})]_l}{[\nabla\gamma(\mathbf{0})]_l} = \\ &= \frac{\min_{t \in \mathcal{T}: r \in \Gamma(t)} \sum_{j \in [N]} \ln(1 - p_j(r, t)) \prod_{j \in [N]} (1 - P_j(2\bar{s}_j, t))}{\sum_{t \in \mathcal{T}: r \in \Gamma(t)} \ln(1 - p_i(r, t))} \\ &=: 1 - \alpha > 0. \end{aligned}$$

Hence, using Theorem 1 we conclude that  $PoA_{CCE} \leq 1 + \alpha$ .  $\square$

### A.4 Proof of Fact 1

Condition i) holds since  $\gamma$  is monotone DR-submodular by definition. Also, condition ii) holds with equality. Moreover, defining (with abuse of notation)  $[\mathbf{s}]_1^i = (\mathbf{s}_1, \dots, \mathbf{s}_i, \mathbf{0}, \dots, \mathbf{0})$  for  $i \in [N]$  with  $[\mathbf{s}]_1^0 = \mathbf{0}$ , condition iii) holds since by DR-submodularity one can verify that  $\sum_{i=1}^N \hat{\pi}_i(\mathbf{s}) = \sum_{i=1}^N \gamma(\mathbf{s}) - \gamma(\mathbf{0}, \mathbf{s}_{-i}) \leq \gamma([\mathbf{s}]_1^i) - \gamma([\mathbf{s}]_1^{i-1}) = \gamma(\mathbf{x}) - \gamma(\mathbf{0}) = \gamma(\mathbf{x})$ .  $\square$

### A.5 Proof of Corollary 1

By definition of  $\alpha$ , and according to Theorem 1,  $\hat{\mathcal{G}}$  is such that  $PoA_{CCE} \leq (1 + \alpha)$ . In other words, letting  $\mathbf{s}^* = \arg \max_{\mathbf{s} \in \mathcal{S}} \gamma(\mathbf{s})$ , any CCE  $\sigma$  of  $\hat{\mathcal{G}}$  satisfies  $\mathbb{E}_{\mathbf{s} \sim \sigma}[\gamma(\mathbf{s})] \geq 1/(1 + \alpha)\gamma(\mathbf{s}^*)$ . Moreover, since players simultaneously use no-regret algorithms D-NOREGRET converges to one of such CCE [15, 28]. Hence, the statement of the remark follows.  $\square$

### A.6 Proof of Proposition 2

Consider the sensor coverage problem with continuous assignments defined in Example 2. We first show that  $\gamma$  is a monotone DR-submodular function. In fact, for any  $i \in [Nd]$ ,  $[\nabla\gamma(\mathbf{x})]_i = -\ln(1 - p_l^m) \prod_{i \in [N]} (1 - p_i^m)^{[\mathbf{x}]_i^m} \geq 0$ , where  $l$  and  $m$  and the indexes of sensor and location corresponding to coordinate  $i$ , respectively. Moreover, for any pair of sensors  $j, l \in [N]$ ,  $\frac{\partial^2 \gamma(\mathbf{x})}{\partial [\mathbf{x}_j]_m \partial [\mathbf{x}_l]_n} = -\ln(1 - p_j^m) \ln(1 - p_l^n) \prod_{i \in [N]} (1 - p_i^m)^{[\mathbf{x}]_i^m} \leq 0$  if  $m = n$ , and 0 otherwise. The problem of maximizing  $\gamma$  subject to  $\mathcal{X} = \prod_{i=1}^N \mathcal{X}_i$ , hence, is one of maximizing a monotone DR-submodular function subject to decoupled constraints discussed in Section 3.2. Thus, as outlined in Section 3.2, we can set-up a valid utility game  $\hat{\mathcal{G}}$ .

The vector  $\mathbf{x}_{max} = 2\bar{\mathbf{x}} = 2(\bar{x}_1, \dots, \bar{x}_N)$  is such that  $\forall \mathbf{x}, \mathbf{x}' \in \mathcal{X}$ ,  $\mathbf{x} + \mathbf{x}' \leq \mathbf{x}_{max}$ . Moreover, defining  $\tilde{\mathcal{X}} := \{\mathbf{x} \in \mathbb{R}_+^{Nd} \mid \mathbf{0} \leq \mathbf{x} \leq \mathbf{x}_{max}\}$ , the curvature of  $\gamma$  with respect to  $\tilde{\mathcal{X}}$ , satisfies  $\alpha(\tilde{\mathcal{X}}) = 1 - \inf_{\substack{\mathbf{x} \in \tilde{\mathcal{X}} \\ l \in [Nd]}} \frac{[\nabla\gamma(\mathbf{x})]_l}{[\nabla\gamma(\mathbf{0})]_l} = 1 - \min_{r \in [d]} \prod_{i \in [N]} (1 - p_r^i)^{2\bar{x}_i} = \max_{r \in [d]} P(r, 2\bar{\mathbf{x}}) = \alpha$ . Hence, by Corollary 1, any no-regret distributed algorithm has expected approximation ratio of  $1/(1 + \alpha)$ . In addition,  $\gamma$  is also concave in each  $\mathcal{X}_i$ , since the  $(d \times d)$  blocks on the diagonal of its Hessian are diagonal and negative, hence online gradient ascent ensures no-regret for each player [12] and can be run in a distributed manner.  $\square$

### A.7 Equivalent characterizations of DR properties

To prove the main results of the paper, the following two propositions provide equivalent characterizations

of weak DR and DR properties, respectively<sup>4</sup>.

**Proposition 4.** A function  $f : \mathcal{X} \subseteq \mathbb{R}^n \rightarrow \mathbb{R}$  is *weakly DR-submodular* (Definition 4) if and only if for all  $\mathbf{x} \leq \mathbf{y} \in \mathcal{X}$ ,  $\forall \mathbf{z} \in \mathbb{R}_+^n$  s.t.  $(\mathbf{x} + \mathbf{z})$  and  $(\mathbf{y} + \mathbf{z})$  are in  $\mathcal{X}$ , with  $z_i = 0 \forall i \in [n] : y_i > x_i$ ,

$$f(\mathbf{x} + \mathbf{z}) - f(\mathbf{x}) \geq f(\mathbf{y} + \mathbf{z}) - f(\mathbf{y}).$$

*Proof.* (property of Proposition 4  $\rightarrow$  weak DR)

We want to prove that for all  $\mathbf{x} \leq \mathbf{y} \in \mathcal{X}$ ,  $\forall i$  s.t.  $x_i = y_i$ ,  $\forall k \in \mathbb{R}_+$  s.t.  $(\mathbf{x} + k\mathbf{e}_i)$  and  $(\mathbf{y} + k\mathbf{e}_i)$  are in  $\mathcal{X}$ ,

$$f(\mathbf{x} + k\mathbf{e}_i) - f(\mathbf{x}) \geq f(\mathbf{y} + k\mathbf{e}_i) - f(\mathbf{y}).$$

This is trivially done choosing  $\mathbf{z} = k\mathbf{e}_i$ . Note that  $\mathbf{z}$  is such that  $z_i = 0, \forall i \in \{i | y_i > x_i\}$ , so the property of Proposition 4 can indeed be applied.

(weak DR  $\rightarrow$  property of Proposition 4)

For all  $\mathbf{x} \leq \mathbf{y} \in \mathcal{X}$ ,  $\forall \mathbf{z} \in \mathbb{R}_+^n$  s.t.  $(\mathbf{x} + \mathbf{z})$  and  $(\mathbf{y} + \mathbf{z})$  are in  $\mathcal{X}$ , with  $z_i = 0 \forall i \in [n] : y_i > x_i$ , we have

$$\begin{aligned} f(\mathbf{x} + \mathbf{z}) - f(\mathbf{x}) &= \sum_{i=1}^n f(\mathbf{x} + [\mathbf{z}]_1^i) - f(\mathbf{x} + [\mathbf{z}]_1^{i-1}) \\ &= \sum_{i:x_i=y_i} f(\mathbf{x} + [\mathbf{z}]_1^{i-1} + z_i\mathbf{e}_i) - f(\mathbf{x} + [\mathbf{z}]_1^{i-1}) \\ &\geq \sum_{i:x_i=y_i} f(\mathbf{y} + [\mathbf{z}]_1^{i-1} + z_i\mathbf{e}_i) - f(\mathbf{y} + [\mathbf{z}]_1^{i-1}) \\ &= \sum_{i=1}^n f(\mathbf{y} + [\mathbf{z}]_1^i) - f(\mathbf{y} + [\mathbf{z}]_1^{i-1}) \\ &= f(\mathbf{y} + \mathbf{z}) - f(\mathbf{y}). \end{aligned}$$

The first equality is obtained from a telescoping sum, the second equality follows since when  $y_i > x_i$ ,  $z_i = 0$ . The inequality follows from weak DR property of  $f$  and the last two equalities are similar to the first two.  $\square$

**Proposition 5.** A function  $f : \mathcal{X} \subseteq \mathbb{R}^n \rightarrow \mathbb{R}$  is *DR-submodular* (Definition 1) if and only if for all  $\mathbf{x} \leq \mathbf{y} \in \mathcal{X}$ ,  $\forall \mathbf{z} \in \mathbb{R}_+^n$  s.t.  $(\mathbf{x} + \mathbf{z})$  and  $(\mathbf{y} + \mathbf{z})$  are in  $\mathcal{X}$ ,

$$f(\mathbf{x} + \mathbf{z}) - f(\mathbf{x}) \geq f(\mathbf{y} + \mathbf{z}) - f(\mathbf{y}).$$

*Proof.* (property of Proposition 5  $\rightarrow$  DR)

We want to prove that for all  $\mathbf{x} \leq \mathbf{y} \in \mathcal{X}$ ,  $\forall i \in [n]$ ,  $\forall k \in \mathbb{R}_+$  s.t.  $(\mathbf{x} + k\mathbf{e}_i)$  and  $(\mathbf{y} + k\mathbf{e}_i)$  are in  $\mathcal{X}$ ,

$$f(\mathbf{x} + k\mathbf{e}_i) - f(\mathbf{x}) \geq f(\mathbf{y} + k\mathbf{e}_i) - f(\mathbf{y}).$$

This is trivially done choosing  $\mathbf{z} = k\mathbf{e}_i$  and applying the property of Proposition 5.

<sup>4</sup>The introduced properties are the continuous versions of the ‘group DR property’[5] of submodular set functions.

(DR  $\rightarrow$  property of Proposition 5)

For all  $\mathbf{x} \leq \mathbf{y} \in \mathcal{X}$ ,  $\forall \mathbf{z} \in \mathbb{R}_+^n$  s.t.  $(\mathbf{x} + \mathbf{z})$  and  $(\mathbf{y} + \mathbf{z})$  are in  $\mathcal{X}$ , we have

$$\begin{aligned} f(\mathbf{x} + \mathbf{z}) - f(\mathbf{x}) &= \sum_{i=1}^n f(\mathbf{x} + [\mathbf{z}]_1^i) - f(\mathbf{x} + [\mathbf{z}]_1^{i-1}) \\ &= \sum_{i=1}^n f(\mathbf{x} + [\mathbf{z}]_1^{i-1} + z_i\mathbf{e}_i) - f(\mathbf{x} + [\mathbf{z}]_1^{i-1}) \\ &\geq \sum_{i=1}^n f(\mathbf{y} + [\mathbf{z}]_1^{i-1} + z_i\mathbf{e}_i) - f(\mathbf{y} + [\mathbf{z}]_1^{i-1}) \\ &= \sum_{i=1}^n f(\mathbf{y} + [\mathbf{z}]_1^i) - f(\mathbf{y} + [\mathbf{z}]_1^{i-1}) \\ &= f(\mathbf{y} + \mathbf{z}) - f(\mathbf{y}). \end{aligned}$$

The first and last equalities are telescoping sums and the inequality follows from the DR property of  $f$ .  $\square$

## A.8 Properties of (twice) differentiable submodular functions

As mentioned in Section 4, submodular continuous functions are defined on subsets of  $\mathbb{R}^n$  of the form  $\mathcal{X} = \prod_{i=1}^n \mathcal{X}_i$ , where each  $\mathcal{X}_i$  is a compact subset of  $\mathbb{R}$ . From the weak DR property (Definition 4) it follows that, when  $f$  is differentiable, it is submodular iff

$$\forall \mathbf{x}, \mathbf{y} \in \mathcal{X} : \mathbf{x} \leq \mathbf{y}, \forall i \text{ s.t. } x_i = y_i, \nabla_i f(\mathbf{x}) \geq \nabla_i f(\mathbf{y}).$$

That is, the gradient of  $f$  is a weak antitone mapping from  $\mathbb{R}^n$  to  $\mathbb{R}^n$ .

Moreover, we saw that a function  $f : \mathcal{X} \rightarrow \mathbb{R}$  is *submodular* iff for all  $\mathbf{x} \in \mathcal{X}$ ,  $\forall i \neq j$  and  $a_i, a_j > 0$  s.t.  $x_i + a_i \in \mathcal{X}_i$ ,  $x_j + a_j \in \mathcal{X}_j$ , we have [1]

$$f(\mathbf{x} + a_i\mathbf{e}_i) - f(\mathbf{x}) \geq f(\mathbf{x} + a_i\mathbf{e}_i + a_j\mathbf{e}_j) - f(\mathbf{x} + a_j\mathbf{e}_j).$$

As visible from the latter condition, when  $f$  is twice-differentiable, it is submodular iff all the off-diagonal entries of its Hessian are non-positive [1]:

$$\forall \mathbf{x} \in \mathcal{X}, \quad \frac{\partial^2 f(\mathbf{x})}{\partial x_i \partial x_j} \leq 0, \quad \forall i \neq j.$$

Hence, the class of submodular continuous functions contains a subset of both convex and concave functions.

Similarly, from the DR property (Definition 1) it follows that for a differentiable continuous function DR-submodularity is equivalent to

$$\forall \mathbf{x} \leq \mathbf{y}, \nabla f(\mathbf{x}) \geq \nabla f(\mathbf{y}).$$

That is, the gradient of  $f$  is an antitone mapping from  $\mathbb{R}^n$  to  $\mathbb{R}^n$ . More precisely, [4, Proposition 2] showed

that a function  $f$  is DR-submodular iff it is submodular (weakly DR-submodular) and *coordinate-wise concave*. A function  $f : \mathcal{X} \rightarrow \mathbb{R}$  is coordinate-wise concave if, for all  $\mathbf{x} \in \mathcal{X}$ ,  $\forall i \in [n], \forall k, l \in \mathbb{R}_+$  s.t.  $(\mathbf{x} + k\mathbf{e}_i)$ ,  $(\mathbf{x} + l\mathbf{e}_i)$ , and  $(\mathbf{x} + (k+l)\mathbf{e}_i)$  are in  $\mathcal{X}$ , we have

$$f(\mathbf{x} + k\mathbf{e}_i) - f(\mathbf{x}) \geq f(\mathbf{x} + (k+l)\mathbf{e}_i) - f(\mathbf{x} + l\mathbf{e}_i),$$

or equivalently, if twice differentiable,  $\frac{\partial^2 f(\mathbf{x})}{\partial x_i^2} \leq 0$   $\forall i \in [n]$ . Hence, as stated in Section 3, a twice-differentiable function is DR-submodular iff all the entries of its Hessian are non-positive:

$$\forall \mathbf{x} \in \mathcal{X}, \quad \frac{\partial^2 f(\mathbf{x})}{\partial x_i \partial x_j} \leq 0, \quad \forall i, j.$$

### A.9 Proof of Proposition 3

By Definition 2, the curvature  $\alpha(\mathcal{Z})$  of  $f$  w.r.t.  $\mathcal{Z}$  satisfies

$$f(\mathbf{x} + k\mathbf{e}_i) - f(\mathbf{x}) \geq (1 - \alpha(\mathcal{Z}))[f(k\mathbf{e}_i) - f(\mathbf{0})], \quad (1)$$

for any  $\mathbf{x} \in \mathcal{Z}, i \in [n]$  s.t.  $\mathbf{x} + k\mathbf{e}_i \in \mathcal{Z}$  with  $k \rightarrow 0_+$ . We firstly show that condition (1) indeed holds for any  $\mathbf{x} \in \mathcal{Z}, i \in [n]$ , and  $k \in \mathbb{R}_+$  s.t.  $\mathbf{x} + k\mathbf{e}_i \in \mathcal{Z}$ , by using monotonicity and coordinate-wise concavity of  $f$ . As seen in Appendix A.8, DR-submodularity implies coordinate-wise concavity. To this end, we define

$$\alpha_i^k(\mathcal{Z}) = 1 - \inf_{\substack{\mathbf{x} \in \mathcal{Z}: \\ \mathbf{x} + k\mathbf{e}_i \in \mathcal{Z}}} \frac{f(\mathbf{x} + k\mathbf{e}_i) - f(\mathbf{x})}{f(k\mathbf{e}_i) - f(\mathbf{0})}.$$

Hence, it suffices to prove that, for any  $i \in [n]$ ,  $\alpha_i^k(\mathcal{Z})$  is non-increasing in  $k$ . Note that by DR-submodularity,

$$\alpha_i^k(\mathcal{Z}) = 1 - \frac{f(\mathbf{z}_{max}) - f(\mathbf{z}_{max} - k\mathbf{e}_i)}{f(k\mathbf{e}_i) - f(\mathbf{0})}.$$

Hence, for any pair  $l, m \in \mathbb{R}_+$  with  $l < m$ ,  $\alpha_i^m(\mathcal{Z}) \geq \alpha_i^l(\mathcal{Z})$  is true whenever

$$\frac{f(\mathbf{z}_{max}) - f(\mathbf{z}_{max} - m\mathbf{e}_i)}{f(m\mathbf{e}_i) - f(\mathbf{0})} \geq \frac{f(\mathbf{z}_{max}) - f(\mathbf{z}_{max} - l\mathbf{e}_i)}{f(l\mathbf{e}_i) - f(\mathbf{0})}.$$

The last inequality is satisfied since, by coordinate-wise concavity,  $[f(\mathbf{z}_{max}) - f(\mathbf{z}_{max} - m\mathbf{e}_i)]/m \geq [f(\mathbf{z}_{max}) - f(\mathbf{z}_{max} - l\mathbf{e}_i)]/l$  and  $[f(m\mathbf{e}_i) - f(\mathbf{0})]/m \leq [f(l\mathbf{e}_i) - f(\mathbf{0})]/l$ . This is because, given a concave function  $g : \mathbb{R} \rightarrow \mathbb{R}$ , the quantity

$$R(x_1, x_2) := \frac{g(x_2) - g(x_1)}{x_2 - x_1}$$

is non-increasing in  $x_1$  for fixed  $x_2$ , and vice versa. Moreover, monotonicity ensures that all of the above ratios are non-negative.

To conclude the proof of Proposition 3 we show that if condition (1) holds for any  $\mathbf{x} \in \mathcal{Z}, i \in [n]$ , and  $k \in \mathbb{R}_+$  s.t.  $\mathbf{x} + k\mathbf{e}_i \in \mathcal{Z}$ , then the result of the proposition follows. Indeed, for any  $\mathbf{x}, \mathbf{y}$  s.t.  $\mathbf{x} + \mathbf{y} \in \mathcal{Z}$  we have

$$\begin{aligned} f(\mathbf{x} + \mathbf{y}) - f(\mathbf{x}) &= \sum_{i=1}^n f(\mathbf{x} + [\mathbf{y}]_1^i) - f(\mathbf{x} + [\mathbf{y}]_1^{i-1}) \\ &= \sum_{i=1}^n f(\mathbf{x} + [\mathbf{y}]_1^{i-1} + y_i \mathbf{e}_i) - f(\mathbf{x} + [\mathbf{y}]_1^{i-1}) \\ &\geq (1 - \alpha(\mathcal{Z})) \sum_{i=1}^n f(y_i \mathbf{e}_i) - f(\mathbf{0}) \\ &\geq (1 - \alpha(\mathcal{Z})) \sum_{i=1}^n f([\mathbf{y}]_1^i) - f([\mathbf{y}]_1^{i-1}) \\ &= (1 - \alpha(\mathcal{Z}))(f(\mathbf{y}) - f(\mathbf{0})), \end{aligned}$$

where the first inequality follows by condition (1) and the second one from  $f$  being weakly DR-submodular (and using Proposition 4).  $\square$

## B Supplementary material for Section 5

In the first part of this appendix we generalize the submodularity ratio defined in [11] for set functions to continuous domains and discuss its main properties. We compare it to the ratio by [16] and we relate it to the generalized submodularity ratio defined in Definition 5. Then, we provide a class of social functions with generalized submodularity ratio  $0 < \eta < 1$  and we report the proof of Theorem 2. Finally, we analyze the sensor coverage problem with the non-submodular objective defined in Section 5.

### B.1 Submodularity ratio of a monotone function on continuous domains

We generalize the class of submodular continuous functions, defining the *submodularity ratio*  $\eta \in [0, 1]$  of a monotone function defined on a continuous domain.

**Definition 7** (submodularity ratio). The submodularity ratio of a monotone function  $f : \mathcal{X} \subseteq \mathbb{R}_+^n \rightarrow \mathbb{R}$  is the largest scalar  $\eta$  such that for all  $\mathbf{x}, \mathbf{y} \in \mathcal{X}$  such that  $\mathbf{x} + \mathbf{y} \in \mathcal{X}$ ,

$$\sum_{i=1}^n [f(\mathbf{x} + y_i \mathbf{e}_i) - f(\mathbf{x})] \geq \eta [f(\mathbf{x} + \mathbf{y}) - f(\mathbf{x})].$$

It is straightforward to show that  $\eta \in [0, 1]$  and, when restricted to binary sets  $\mathcal{X} = \{0, 1\}^n$ , Definition 7 coincides with the submodularity ratio defined in [11] for set functions. A set function is submodular iff it has submodularity ratio  $\eta = 1$  [11]. However, functions with submodularity ratio  $0 < \eta < 1$  still preserve ‘nice’ properties in term of maximization guarantees. Similarly to [11], we can affirm the following.

**Proposition 6.** A function  $f : \mathcal{X} \subseteq \mathbb{R}_+^n \rightarrow \mathbb{R}$  is weakly DR-submodular (Definition 4) iff it has submodularity ratio  $\eta = 1$ .

*Proof.* If  $f$  is weakly DR-submodular (Definition 4), then for any  $\mathbf{x}, \mathbf{y} \in \mathcal{X}$ ,

$$\begin{aligned} & \sum_{i=1}^d f(\mathbf{x} + y_i \mathbf{e}_i) - f(\mathbf{x}) \\ & \geq \sum_{i=1}^d f(\mathbf{x} + [\mathbf{y}]_1^i) - f(\mathbf{x} + [\mathbf{y}]_1^{i-1}) = f(\mathbf{x} + \mathbf{y}) - f(\mathbf{x}). \end{aligned}$$

Assume now  $f$  has submodularity ratio  $\eta = 1$ . We prove that  $f$  is weakly DR-submodular by proving that it is submodular. Hence, we want to prove that for all  $\mathbf{x} \in \mathcal{X}$ ,  $\forall i \neq j$  and  $a_i, a_j > 0$  s.t.  $x_i + a_i \in \mathcal{X}_i$ ,

$$x_j + a_j \in \mathcal{X}_j,$$

$$\begin{aligned} f(\mathbf{x} + a_i \mathbf{e}_i) - f(\mathbf{x}) & \geq \\ f(\mathbf{x} + a_i \mathbf{e}_i + a_j \mathbf{e}_j) - f(\mathbf{x} + a_j \mathbf{e}_j). \end{aligned} \quad (2)$$

Consider  $\mathbf{y} = a_i \mathbf{e}_i + a_j \mathbf{e}_j \in \mathcal{X}$ . Since  $f$  has submodularity ratio  $\eta = 1$ , we have

$$\begin{aligned} f(\mathbf{x} + a_i \mathbf{e}_i) - f(\mathbf{x}) + f(\mathbf{x} + a_j \mathbf{e}_j) - f(\mathbf{x}) \\ \geq f(\mathbf{x} + a_i \mathbf{e}_i + a_j \mathbf{e}_j) - f(\mathbf{x}), \end{aligned}$$

which is equivalent to the submodularity condition (2).  $\square$

An example of functions with submodularity ratio  $\eta > 0$  is the product between an affine and a weakly DR-submodular function, as stated in the following proposition.

**Proposition 7.** Let  $f, \rho : \mathcal{X} \subseteq \mathbb{R}_+^n \rightarrow \mathbb{R}_+$  be two monotone functions, with  $f$  weakly DR-submodular, and  $g$  affine such that  $\rho(\mathbf{x}) = \mathbf{a}^\top \mathbf{x} + b$  with  $\mathbf{a} \geq \mathbf{0}$  and  $b > 0$ . Then, provided that  $\mathcal{X}$  is bounded, the product  $g(\mathbf{x}) := f(\mathbf{x})\rho(\mathbf{x})$  has submodularity ratio  $\eta = \inf_{i \in [n], \mathbf{x} \in \mathcal{X}} \frac{b}{b + \sum_{j \neq i} a_j x_j} > 0$ .

*Proof.* Note that since  $\rho$  is affine, for any  $\mathbf{x}, \mathbf{y} \in \mathcal{X}$  we have that  $g(\mathbf{x} + \mathbf{y}) - g(\mathbf{x}) = f(\mathbf{x} + \mathbf{y})\rho(\mathbf{x} + \mathbf{y}) - f(\mathbf{x})\rho(\mathbf{x}) = \rho(\mathbf{x} + \mathbf{y})[f(\mathbf{x} + \mathbf{y}) - f(\mathbf{x})] + f(\mathbf{x})(\mathbf{a}^\top \mathbf{y})$ . For any pair  $\mathbf{x}, \mathbf{y} \in \mathcal{X}$  we have:

$$\begin{aligned} & \sum_{i=1}^n [g(\mathbf{x} + y_i \mathbf{e}_i) - g(\mathbf{x})] \\ & = \sum_{i=1}^n \rho(\mathbf{x} + y_i \mathbf{e}_i) [f(\mathbf{x} + y_i \mathbf{e}_i) - f(\mathbf{x})] + f(\mathbf{x})(y_i \mathbf{a}^\top \mathbf{e}_i) \\ & \geq \min_{i \in [n]} \rho(\mathbf{x} + y_i \mathbf{e}_i) \sum_{i=1}^n f(\mathbf{x} + y_i \mathbf{e}_i) - f(\mathbf{x}) + f(\mathbf{x})(\mathbf{a}^\top \mathbf{y}) \\ & \geq \underbrace{\frac{\min_{i \in [n]} \rho(\mathbf{x} + y_i \mathbf{e}_i)}{\rho(\mathbf{x} + \mathbf{y})}}_{:= \eta(\mathbf{x}, \mathbf{y})} \left( \rho(\mathbf{x} + \mathbf{y}) [f(\mathbf{x} + \mathbf{y}) - f(\mathbf{x})] + f(\mathbf{x})(\mathbf{a}^\top \mathbf{y}) \right) \\ & = \eta(\mathbf{x}, \mathbf{y}) [g(\mathbf{x} + \mathbf{y}) - g(\mathbf{x})]. \end{aligned}$$

The first inequality follows since  $\rho$  is affine non-negative and  $f$  is non-negative. The second inequality is due to  $f$  being weakly DR-submodular ( $f$  has submodularity ratio  $\eta = 1$ ) and  $0 < \eta(\mathbf{x}, \mathbf{y}) \leq 1$ , which holds because  $b > 0$  and  $\mathbf{a} \geq \mathbf{0}$ . Hence, it follows that  $g$  has submodularity ratio

$$\eta := \inf_{\substack{\mathbf{x}, \mathbf{y} \in \mathcal{X}: \\ \mathbf{x} + \mathbf{y} \in \mathcal{X}}} \eta(\mathbf{x}, \mathbf{y}) = \inf_{i \in [n], \mathbf{y} \in \mathcal{X}} \frac{b}{b + \sum_{j \neq i} a_j y_j} > 0.$$

$\square$

### B.1.1 Related notion by [16]

A generalization of submodular continuous functions was also provided in [16] together with provable maximization guarantees. However, it has different implications than the submodularity ratio defined above. In fact, [16] considered the class of differentiable functions  $f : \mathcal{X} \subseteq \mathbb{R}_+^n \rightarrow \mathbb{R}$  with parameter  $\eta$  defined as

$$\eta = \inf_{\mathbf{x}, \mathbf{y} \in \mathcal{X}, \mathbf{x} \leq \mathbf{y}} \inf_{i \in [n]} \frac{[\nabla f(\mathbf{x})]_i}{[\nabla f(\mathbf{y})]_i}.$$

For monotone functions  $\eta \in [0, 1]$ , and a differentiable function is DR-submodular iff  $\eta = 1$  [16]. Note that the parameter  $\eta$  of [16] generalizes the DR property of  $f$ , while our submodularity ratio  $\eta$  generalizes the weak DR property.

### B.2 Relations with the generalized submodularity ratio of Definition 5

In Proposition 6 we saw that submodularity ratio  $\eta = 1$  is a necessary and sufficient condition for weak DR-submodularity. In contrast, a generalized submodularity ratio (Definition 5)  $\eta = 1$  is only necessary for the social function  $\gamma$  to be weakly DR-submodular. This is stated in the following proposition. For non submodular  $\gamma$ , no relation can be established between submodularity ratio of Definition 7 and generalized submodularity ratio of Definition 5.

**Proposition 8.** Given a game  $\mathcal{G} = (N, \{\mathcal{S}_i\}_{i=1}^N, \{\pi_i\}_{i=1}^N, \gamma)$ . If  $\gamma$  is weakly DR-submodular, then  $\gamma$  has generalized submodularity ratio  $\eta = 1$ .

*Proof.* Consider any pair of outcomes  $\mathbf{s}, \mathbf{s}' \in \mathcal{S}$ . For  $i \in \{0, \dots, N\}$ , with abuse of notation we define  $[\mathbf{s}']_1^i := (\mathbf{s}'_1, \dots, \mathbf{s}'_i, \mathbf{0}, \dots, \mathbf{0})$  with  $[\mathbf{s}']_1^0 = \mathbf{0}$ . We have,

$$\begin{aligned} & \sum_{i=1}^N \gamma(\mathbf{s}_i + \mathbf{s}'_i, \mathbf{s}_{-i}) - \gamma(\mathbf{s}) \\ & \geq \sum_{i=1}^N \gamma(\mathbf{s} + [\mathbf{s}']_1^i) - \gamma(\mathbf{s} + [\mathbf{s}']_1^{i-1}) \\ & = \gamma(\mathbf{s} + \mathbf{s}') - \gamma(\mathbf{s}), \end{aligned}$$

where the inequality follows since  $\gamma$  is weakly DR-submodular and the equality is a telescoping sum.  $\square$

Similarly to Proposition 7 in the previous section, in the following proposition we show that social functions  $\gamma$  defined as product of weakly DR-submodular functions and affine functions have generalized submodularity ratio  $\eta > 0$ .

**Proposition 9.** Given a game  $\mathcal{G} = (N, \{\mathcal{S}_i\}_{i=1}^N, \{\pi_i\}_{i=1}^N, \gamma)$ . Let  $\gamma$  be defined as  $\gamma(\mathbf{s}) := f(\mathbf{x})\rho(\mathbf{x})$  with  $f, \rho : \mathbb{R}_+^{Nd} \rightarrow \mathbb{R}_+$  be two monotone functions, with  $f$  weakly DR-submodular, and  $g$  affine such that  $\rho(\mathbf{x}) = \mathbf{a}^\top \mathbf{x} + b$  with  $\mathbf{a} = (\mathbf{a}_1, \dots, \mathbf{a}_N) \geq \mathbf{0}$  and  $b > 0$ . Then,  $\gamma$  has generalized submodularity ratio  $\eta = \inf_{i \in [N], \mathbf{s} \in \mathcal{S}} \frac{b}{b + \sum_{j \neq i} \mathbf{a}_j^\top \mathbf{s}_j} > 0$ .

*Proof.* The proof is equivalent to the proof of Proposition 7, with the only difference that  $\mathbf{s}'_i$  belong to  $\mathbb{R}_+^d$  instead of  $\mathbb{R}_+$ .  $\square$

Note that for the game considered in the previous proposition, using Proposition 7 one could also affirm that  $\gamma$  has submodularity ratio  $\eta = \inf_{i \in [Nd], \mathbf{s} \in \mathcal{S}} \frac{b}{b + \sum_{j \neq i} [\mathbf{a}]_j [\mathbf{s}]_j} > 0$  which, unless  $d = 1$ , is strictly smaller than its generalized submodularity ratio.

### B.3 Proof of Theorem 2

The proof is equivalent to the proof of Theorem 1, with the only difference that here we prove that  $\mathcal{G}$  is a  $(\eta, \eta)$ -smooth game in the framework of [28]. Then, it follows that  $PoACC E \leq (1 + \eta)/\eta$ .

For the smoothness proof, consider any pair of outcomes  $\mathbf{s}, \mathbf{s}^* \in \mathcal{S}$ . We have:

$$\begin{aligned} & \sum_{i=1}^N \pi_i(\mathbf{s}_i^*, \mathbf{s}_{-i}) \geq \sum_{i=1}^N \gamma(\mathbf{s}_i^*, \mathbf{s}_{-i}) - \gamma(\mathbf{0}, \mathbf{s}_{-i}) \\ & \geq \sum_{i=1}^N \gamma(\mathbf{s}_i^* + \mathbf{s}_i, \mathbf{s}_{-i}) - \gamma(\mathbf{s}) \\ & = \eta \gamma(\mathbf{s} + \mathbf{s}^*) - \eta \gamma(\mathbf{s}). \end{aligned}$$

The first inequality is due to condition ii) of Definition 3. The second inequality follows since  $\gamma$  is player-wise DR-submodular (applying Proposition 5 for each player  $i$ ) and the second inequality from  $\gamma$  having generalized submodularity ratio  $\eta$ .  $\square$

### B.4 Analysis of the sensor coverage problem with non-submodular objective

We analyze the sensor coverage problem with non-submodular objective defined in Section 5, where  $\gamma(\mathbf{x}) = \sum_{r \in [d]} w_r(\mathbf{x}) P(r, \mathbf{x})$  with  $w_r(\mathbf{x}) = \mathbf{a}_r \frac{\sum_{i=1}^N [\mathbf{x}]_i r}{N} + b_r$ . Note that by Proposition 9, the function  $\gamma_r(\mathbf{x}) := w_r(\mathbf{x}) P(r, \mathbf{x})$  has generalized submodularity ratio  $\eta > 0$ , hence it is not hard to show that  $\gamma(\mathbf{x}) = \sum_{r \in [d]} \gamma_r(\mathbf{x})$  shares the same property. Moreover, there exist parameters  $\mathbf{a}_r, b_r$  for which  $\gamma$  is not submodular. Interestingly,  $\gamma$  is concave in each  $\mathcal{X}_i$ .

In fact,  $\gamma_r$ 's are concave in each  $\mathcal{X}_i$  since  $P(r, \mathbf{x})$ 's are concave in each  $\mathcal{X}_i$  and  $w_r$ 's are positive affine functions. Moreover,  $\gamma$  is playerwise DR-submodular since the  $(d \times d)$  blocks on the diagonal of its Hessian are diagonal (and their entries are non-positive, by concavity of  $\gamma$  in each  $\mathcal{X}_i$ ).

To maximize  $\gamma$ , as outlined in Section 3.2, we can set up a game  $\mathcal{G} = (N, \{\mathcal{S}_i\}_{i=1}^N, \{\pi_i\}_{i=1}^N, \gamma)$  where for each player  $i$ ,  $\mathcal{S}_i = \mathcal{X}_i$ , and  $\pi_i(\mathbf{s}) = \gamma(\mathbf{s}) - \gamma(\mathbf{0}, \mathbf{s}_{-i})$  for every outcome  $\mathbf{s} \in \mathcal{S} = \mathcal{X}$ . Hence, condition ii) of Definition 3 is satisfied with equality. Following the proof of Theorem 2, we have that:

$$\sum_{i=1}^N \pi_i(\mathbf{s}_i^*, \mathbf{s}_{-i}) \geq \eta \gamma(\mathbf{s} + \mathbf{s}^*) - \eta \gamma(\mathbf{s})$$

In order to bound  $PoA_{CCE}$ , the last proof steps of Section 4.2 still ought to be used. Such steps rely on condition iii), which in Section 3.2 was proved using submodularity of  $\gamma$ . Although  $\gamma$  is not submodular, we prove a weaker version of condition iii) as follows. By definition of  $\gamma_r$  and for every outcome  $\mathbf{x}$  we have  $\sum_{i=1}^N \gamma_r(\mathbf{s}) - \gamma_r(\mathbf{0}, \mathbf{s}_{-i}) = \sum_{i=1}^N w_r(\mathbf{x}) [P(r, \mathbf{s}) - P(r, (\mathbf{0}, \mathbf{s}_{-i}))] + [w_r(\mathbf{s}_i, \mathbf{0}) - w_r(\mathbf{0})] P(r, (\mathbf{0}, \mathbf{s}_{-i})) \leq w_r(\mathbf{x}) P(r, \mathbf{s}) + P(r, \mathbf{s}) \sum_{i=1}^N [w_r(\mathbf{s}_i, \mathbf{0}) - w_r(\mathbf{0})] = (1 + \frac{w_r(\mathbf{x}) - w_r(\mathbf{0})}{w_r(\mathbf{x})}) \gamma_r(\mathbf{x}) \leq 2\gamma_r(\mathbf{x})$ . The equalities are due to  $w_r$  being affine, the first inequality is due to  $P(r, \cdot)$  being submodular and monotone, and the last inequality holds since  $w_r$  is positive and monotone. Hence, from the inequalities above we have  $\sum_{i=1}^N \pi_i(\mathbf{x}) = \sum_{i=1}^N \gamma(\mathbf{x}) - \gamma(\mathbf{0}, \mathbf{x}_{-i}) \leq 2\gamma(\mathbf{x})$ . Note that a tighter condition can also be derived depending on the functions  $w_r$ 's, using  $(1 + \max_{\mathbf{x} \in \mathcal{X}, r \in [d]} \frac{w_r(\mathbf{x}) - w_r(\mathbf{0})}{w_r(\mathbf{x})})$  in place of 2. We will now use such condition in the same manner condition iii) was used in Section 4.2. Let  $\mathbf{s}^* = \arg \max_{\mathbf{s} \in \mathcal{S}} \gamma(\mathbf{s})$ . Then, for any CCE  $\sigma$  of  $\mathcal{G}$  we have

$$\begin{aligned} \mathbb{E}_{\mathbf{s} \sim \sigma} [\gamma(\mathbf{s})] &\geq \frac{1}{2} \sum_{i=1}^N \mathbb{E}_{\mathbf{s} \sim \sigma} [\pi_i(\mathbf{s})] \geq \frac{1}{2} \sum_{i=1}^N \mathbb{E}_{\mathbf{s} \sim \sigma} [\pi_i(\mathbf{s}_i^*, \mathbf{s}_{-i})] \\ &\geq \frac{\eta}{2} \gamma(\mathbf{s}^*) - \frac{\eta}{2} \mathbb{E}_{\mathbf{s} \sim \sigma} [\gamma(\mathbf{s})]. \end{aligned}$$

Hence,  $PoA_{CCE} \leq (1 + 0.5\eta)/0.5\eta$ .
